# Supplementary material for: Association of age and spherical equivalent with differences in cycloplegic refractive effects between cyclopentolate and atropine
Source: Research Square preprint supplement (doi:10.21203/rs.3.rs-7997186/v1), 2025-11-18
Supplement: Supplementary file 1 [file d94609172e90fde86aeffb43.docx]

| **Table 2 Multivariate analysis investigating the association between age at first examination and differences in refractive volume** | | | |
| --- | --- | --- | --- |
| **Variables** | **β** | **95% CI** | **p-value** |
| Age at first examination | -0.04 | -0.07, -0.01 | 0.014* |
| Gender |  |  |  |
| Male | Reference |  |  |
| Female | -0.05 | -0.15, 0.05 | 0.4 |
| Eye |  |  |  |
| Left | Reference |  |  |
| Right | 0.05 | -0.05, 0.16 | 0.3 |
| CI: Confidence Interval |  |  |  |
| Β: Coefficient |  |  |  |
