# Supplementary material for: Association of age and spherical equivalent with differences in cycloplegic refractive effects between cyclopentolate and atropine
Source: Research Square preprint supplement (doi:10.21203/rs.3.rs-7997186/v1), 2025-11-18
Supplement: Supplementary file 2 [file eb5b408a2efdf11d172312b0.docx]

| **Table 1 Characteristics of eyes of the study population** | | |  | | |  | |  | |
| --- | --- | --- | --- | --- | --- | --- | --- | --- | --- |
| **Variables** | **All (N = 188a)** | | **< 0.5 D (n = 105a)** | | | **≧ 0.5 and < 1.0 D (n = 69a)** | | **1.0 D ≦ (n = 14a)** | |
| Gender |  | |  | | |  | |  | |
| Male | 98 (52%) | | 51 (49%) | | | 35 (51%) | | 12 (86%) | |
| Female | 90 (48%) | | 54 (51%) | | | 34 (49%) | | 2 (14%) | |
| Eye |  | |  | | |  | |  | |
| Left | 94 (50%) | | 61 (58%) | | | 25 (36%) | | 6 (43%) | |
| Right | 94 (50%) | | 44 (42%) | | | 44 (64%) | | 8 (57%) | |
| Age at first examination  (years) | 6.00  (4.50, 6.67) | | 6.42  (5.33, 7.25) | | | 5.33  (4.33, 6.33) | | 4.81  (3.81, 6.00) | |
| Refractive value of cyclopentolate  (D) | 2.50  (1.50, 4.00) | | 2.63  (1.50, 4.00) | | | 2.25  (1.50, 4.25) | | 1.73  (0.19, 3.38) | |
| Refractive value of atropine  (D) | 2.75  (1.88, 4.53) | | 2.63  (1.75, 4.38) | | | 2.88  (2.00, 4.75) | | 3.17  (1.78, 4.88) | |
| Refraction shift  (Myopia shift or hyperopia shift) | | |  | | |  | |  | |
| Myopia | 31 (16%) | | 31 (30%) | | | 0 (0%) | | 0 (0%) | |
| Hyperopia | 157 (84%) | | 74 (70%) | | | 69 (100%) | | 14 (100%) | |
| *a* n (%); median (interquartile range) | |  | |  |  | |  | |
