# Supplementary material for: Association of age and spherical equivalent with differences in cycloplegic refractive effects between cyclopentolate and atropine
Source: Research Square preprint supplement (doi:10.21203/rs.3.rs-7997186/v1), 2025-11-18
Supplement: Supplementary file 3 [file f016be6092945a5c43f0d0e7.docx]

| **Table 3 Multivariate regression analysis investigating the association between initial equivalent spherical values and differences in refractive values** | | | |
| --- | --- | --- | --- |
| **Variables** | **β** | **95% CI** | **p-value** |
| Initial equivalent spherical value |  |  |  |
| < 1st quartile | Reference |  |  |
| ≧ 1st quartile | -0.09 | -0.22, 0.03 | 0.13 |
| Gender |  |  |  |
| Mele | Reference |  |  |
| Female | -0.07 | -0.17, 0.04 | 0.2 |
| Eye |  |  |  |
| Left | Reference |  |  |
| Right | 0.05 | -0.06, 0.15 | 0.4 |
| CI: Confidence Interval |  |  |  |
| Β: Coefficient |  |  |  |
